# Supplementary material for: A Highly Sensitive and Selective Fluorescent Probe for the Detection of Cerium(III) using Tridentate Based-Oxazolidine: Experimental and DFT Investigations
Source: Research Square preprint supplement (doi:10.21203/rs.3.rs-1835335/v1), 2022-07-20
Supplement: Supplementary file 1 [file 791a88fd4023a46d6e930606.docx]

**Supplementary Material**

**A Highly Sensitive and Selective Fluorescent Probe for the Detection of Cerium(III) using Tridentate Based-Oxazolidine: Experimental and DFT Investigations**

Malinee Promkatkaew1, Laksamee Chaicharoenwimolkul Chuaitammakit2, Kitiya Naree1, Jinnapus Sillapa1 and Sopanat Kongsriprapan1*

*1 Faculty of Science at Si Racha, Kasetsart University, Si Racha Campus, Chonburi, 20230, Thailand*

*2 Chemistry, Faculty of Science and Technology, Suratthani Rajabhat University, 272 Moo 9, Surat-Nasan Road., Khuntale, Muang, Surat Thani 84100, Thailand.*

(*****Corresponding author: *e-mail: sfscispk@ku.ac.th*)

**Spectroscopic data**


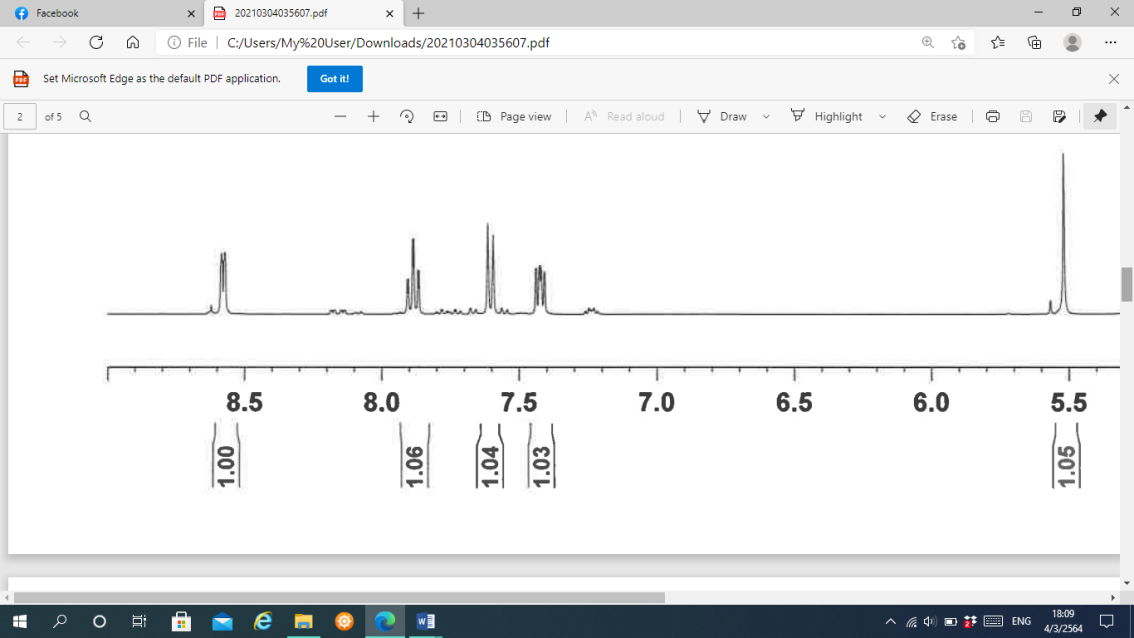

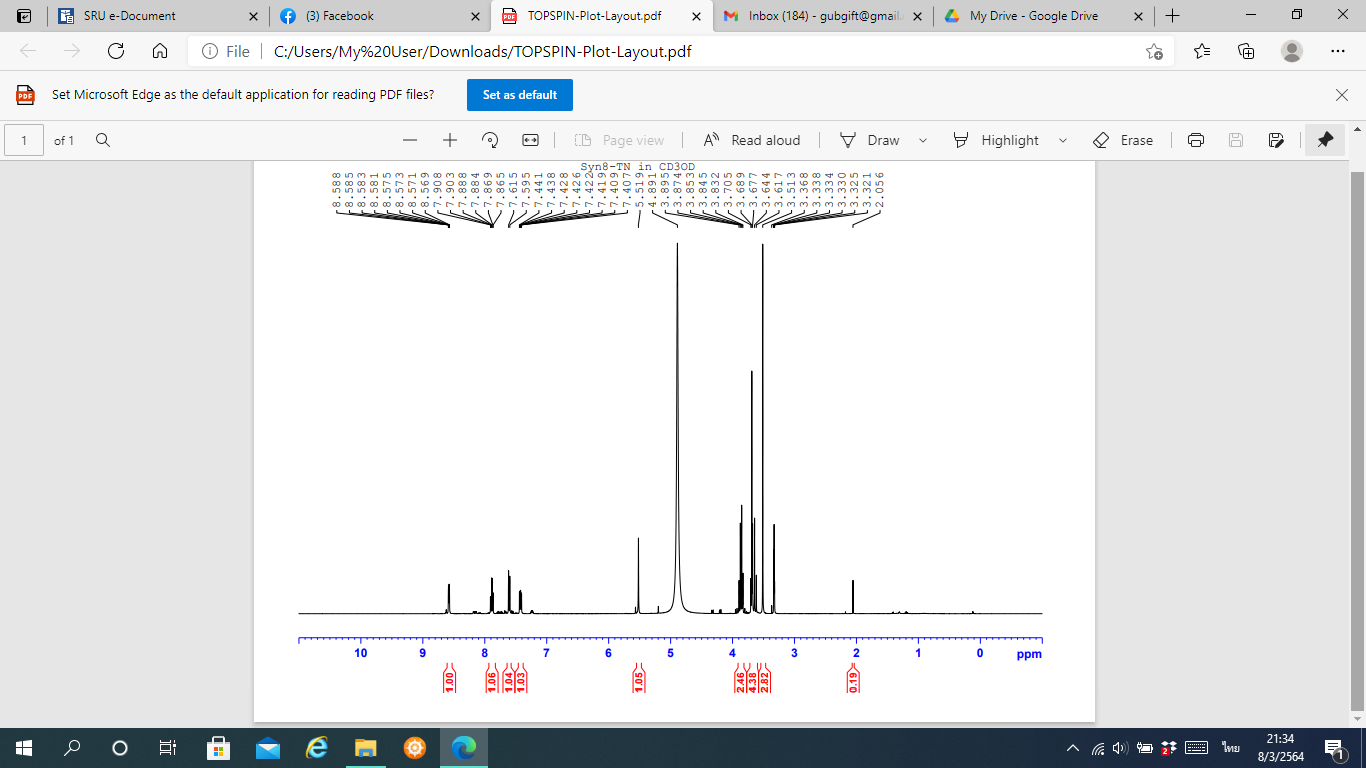


HOD

CD3OD

🗴

**Fig. S1** 1H NMR spectrum of 2-(pyridin-2-yl)oxazolidine-4,4-diyl)dimethanol (**TN**), (CD3OD, 400 MHz).


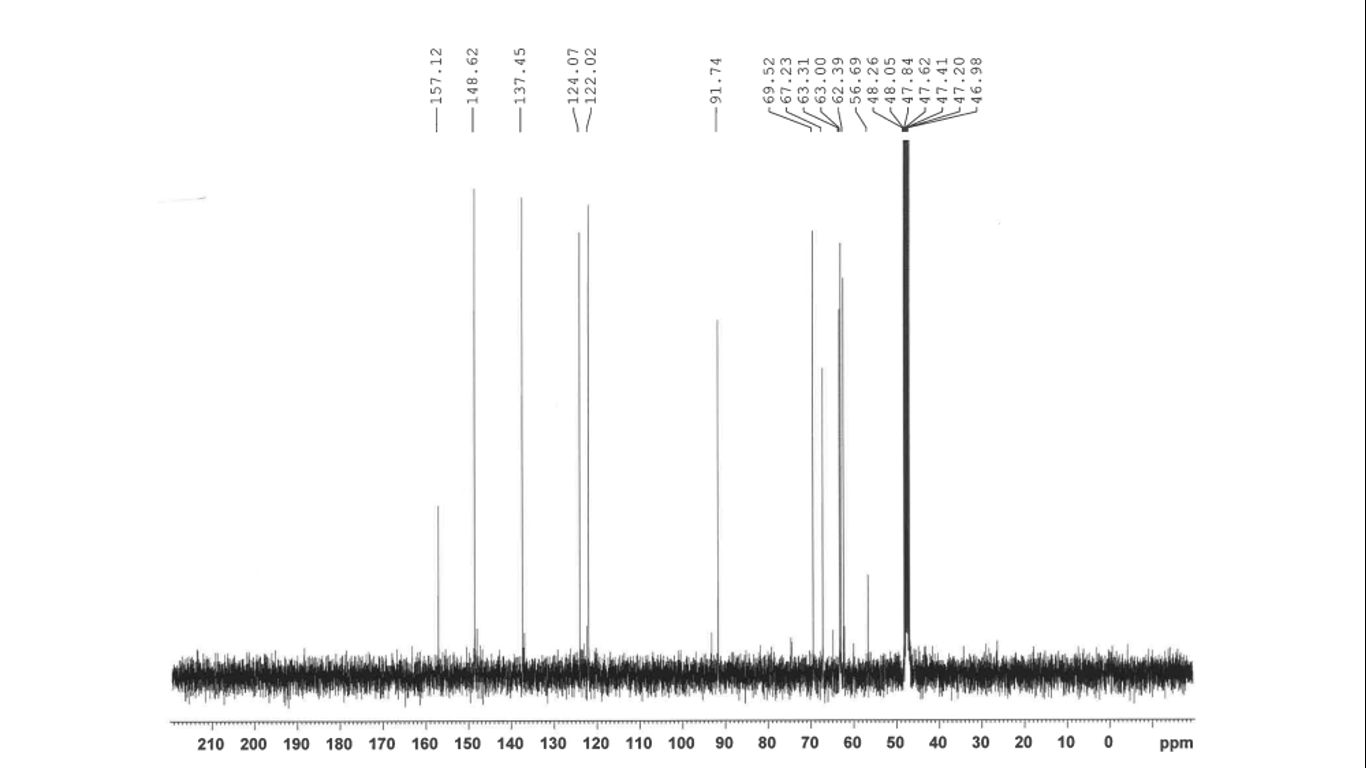


🗴

CD3OD

🗴

**Fig. S2** 13C NMR spectrum of 2-(pyridin-2-yl)oxazolidine-4,4-diyl)dimethanol (**TN**), (CD3OD, 100 MHz).


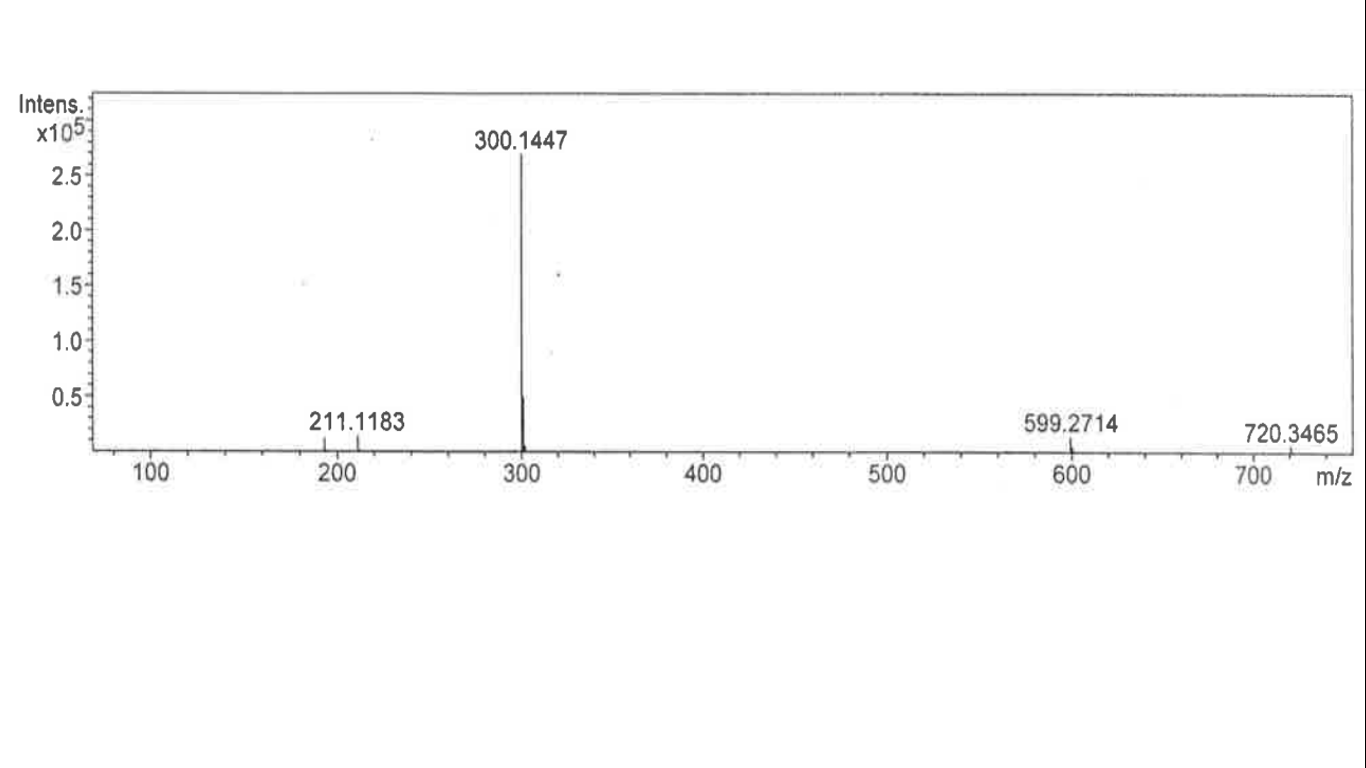


**Fig. S3** Mass spectrum of 2-(pyridin-2-yl)oxazolidine-4,4-diyl)dimethanol (**TN**) (HRMS-ESI-TOF).


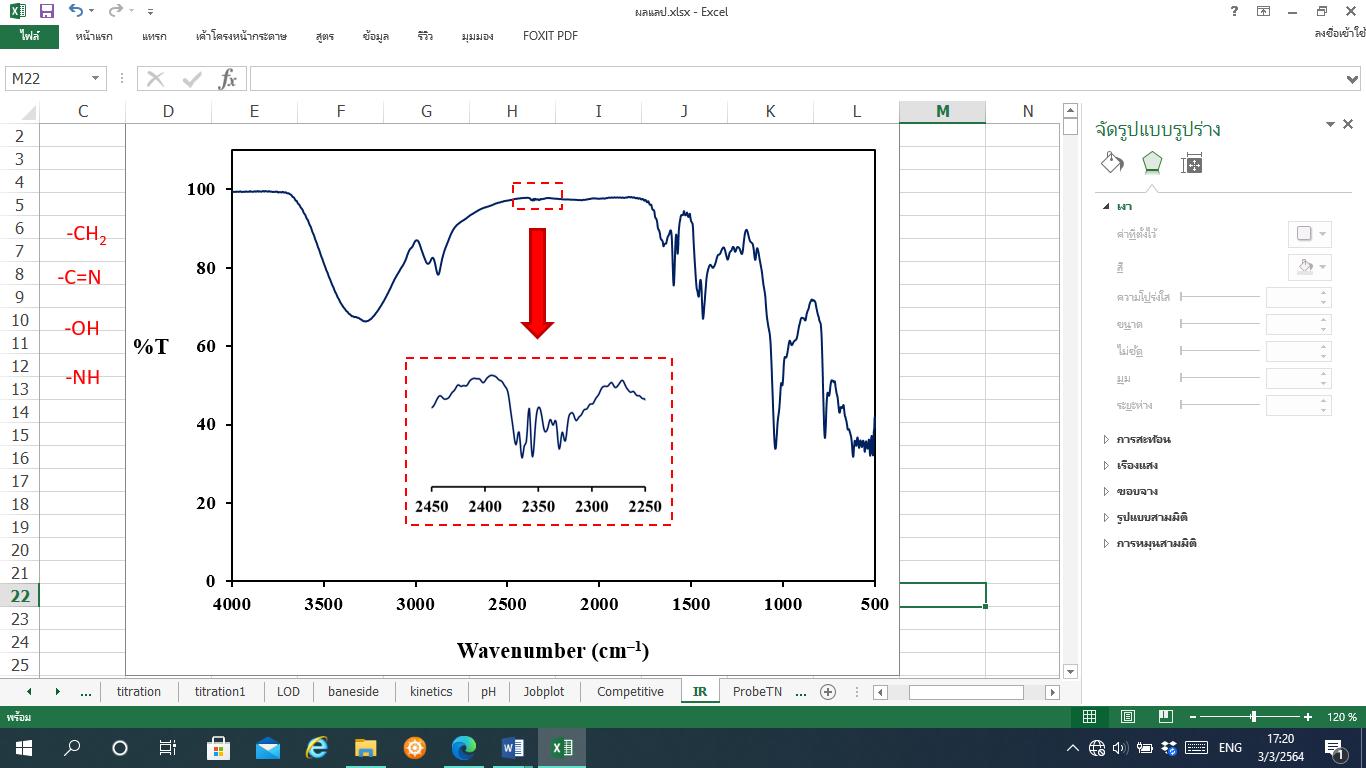


**Fig. S4** Infrared spectrum of 2-(pyridin-2-yl)oxazolidine-4,4-diyl)dimethanol (**TN**).
